# Supplementary material for: Aetiological agents of pneumonia among HIV and non-HIV infected children in Ghana: A case-control study
Source: PubMed Central journal article supplement (PMC10959341; doi:10.1371/journal.pone.0299222), 2024-03-22
Supplement: pone.0299222.s002.pdf [file pone.0299222.s002.pdf]

**S1 Table. Clinical Presentations Associated with Microbial Detection for all cases**

| Clinical Presentation       | Viruses detected (%) |            |         | Bacteria detected (%) |           |         | Viral-Bacterial Co-infection (%) |           |              |
|-----------------------------|----------------------|------------|---------|-----------------------|-----------|---------|----------------------------------|-----------|--------------|
|                             | Negative             | Positive   | P value | Negative              | Positive  | P value | Negative                         | Positive  | P value      |
| Total                       | 105                  | 125        |         | 97                    | 18        |         | 87                               | 28        |              |
| Shortness of breath         | 6 (8.8)              | 7 (9)      | 1       | 5 (8.1)               | 0 (0)     | 1       | 3 (5.2)                          | 2 (15.4)  | 0.224        |
| Poor feeding                | 36 (36)              | 37 (31.4)  | 0.562   | 30 (33.7)             | 6 (37.5)  | 0.993   | 23 (29.1)                        | 13 (50)   | 0.088        |
| Diarrhoea                   | 10 (10.2)            | 14 (12.1)  | 0.831   | 9 (10.3)              | 1 (6.2)   | 1       | 5 (6.4)                          | 5 (20)    | 0.06         |
| Vomiting                    | 25 (25.3)            | 25 (21.2)  | 0.585   | 19 (21.3)             | 7 (43.8)  | 0.067   | 21 (26.2)                        | 5 (20)    | 0.714        |
| Rhinorrhoea                 | 34 (34.3)            | 39 (33.3)  | 0.99    | 24 (27)               | 3 (18.8)  | 0.757   | 19 (24.1)                        | 8 (30.8)  | 0.674        |
| Fast breathing              | 40 (41.2)            | 57 (48.7)  | 0.339   | 32 (36.4)             | 5 (33.3)  | 1       | 55 (69.6)                        | 11 (45.8) | 0.06         |
| Chest recession             | 34 (35.8)            | 39 (34.2)  | 0.926   | 21 (24.4)             | 5 (33.3)  | 0.526   | 17 (22.1)                        | 9 (37.5)  | 0.214        |
| Lethargy                    | 18 (18.2)            | 16 (14)    | 0.524   | 10 (11.5)             | 3 (18.8)  | 0.421   | 9 (11.2)                         | 4 (17.4)  | 0.48         |
| Pulmonary crackles          | 36 (36.4)            | 43 (37.1)  | 1       | 27 (30.7)             | 5 (31.2)  | 1       | 25 (31.2)                        | 7 (29.2)  | 1            |
| Wheeze                      | 85 (86.7)            | 90 (78.3)  | 0.153   | 75 (85.2)             | 14 (87.5) | 1       | 69 (86.2)                        | 20 (83.3) | 0.744        |
| Flaring of ala nasi         | 43 (44.8)            | 61 (52.6)  | 0.321   | 31 (34.8)             | 8 (50)    | 0.382   | 25 (31.2)                        | 14 (56)   | <b>0.046</b> |
| Lower chest indrawing       | 42 (43.8)            | 51 (45.1)  | 0.952   | 26 (30.2)             | 7 (43.8)  | 0.441   | 21 (26.6)                        | 12 (52.2) | <b>0.04</b>  |
| Oxygen required for 48hours | 13 (20)              | 14 (15.7)  | 0.636   | 11 (19.6)             | 3 (30)    | 0.431   | 10 (20.8)                        | 4 (22.2)  | 1            |
| Severe pneumonia            | 94 (92.2)            | 114 (96.6) | 0.249   | 85 (93.4)             | 15 (93.8) | 1       | 74 (91.4)                        | 26 (100)  | 0.191        |
| Very severe pneumonia       | 43 (47.8)            | 53 (52)    | 0.664   | 28 (35.9)             | 7 (43.8)  | 0.758   | 22 (30.1)                        | 13 (61.9) | <b>0.017</b> |
