# Supplementary material for: Aetiological agents of pneumonia among HIV and non-HIV infected children in Ghana: A case-control study
Source: PubMed Central journal article supplement (PMC10959341; doi:10.1371/journal.pone.0299222), 2024-03-22
Supplement: pone.0299222.s003.pdf [file pone.0299222.s003.pdf]

**S2 Table. Clinical Presentation Associated with Microbial Detection in HIV Patients with Pneumonia**

| Clinical Presentation       | Viruses detected (%) |           |              | Bacteria detected (%) |          |         | Viral-Bacterial Co-infection (%) |          |              |
|-----------------------------|----------------------|-----------|--------------|-----------------------|----------|---------|----------------------------------|----------|--------------|
|                             | Negative             | Positive  | P value      | Negative              | Positive | P value | Negative                         | Positive | P value      |
| Total                       | 86                   | 61        |              | 91                    | 9        |         | 84                               | 16       |              |
| Shortness of breath         | 2 (5.6)              | 1 (2.9)   | 1            | 2 (5)                 | 0 (0)    | 1       | 1 (2.6)                          | 1 (14.3) | 0.284        |
| Poor feeding                | 4 (10.3)             | 7 (17.9)  | 0.515        | 7 (14.9)              | 0 (0)    | 0.582   | 2 (4.8)                          | 5 (45.5) | <b>0.003</b> |
| Diarrhoea                   | 4 (10.5)             | 4 (10.3)  | 1            | 4 (8.7)               | 1 (16.7) | 0.473   | 3 (7.3)                          | 2 (18.2) | 0.283        |
| Vomiting                    | 3 (7.7)              | 2 (5.1)   | 1            | 4 (8.5)               | 1 (16.7) | 0.465   | 4 (9.5)                          | 1 (9.1)  | 1            |
| Rhinorrhoea                 | 4 (10.3)             | 5 (12.8)  | 1            | 4 (8.5)               | 0 (0)    | 1       | 2 (4.8)                          | 2 (18.2) | 0.187        |
| Fast breathing              | 3 (7.7)              | 8 (21.1)  | 0.177        | 6 (13)                | 1 (16.7) | 1       | 2 (4.8)                          | 5 (50)   | <b>0.002</b> |
| Chest recession             | 5 (13.9)             | 6 (16.7)  | 1            | 7 (15.9)              | 0 (0)    | 0.576   | 3 (7.5)                          | 4 (40)   | <b>0.023</b> |
| Lethargy                    | 3 (7.7)              | 3 (8.6)   | 1            | 4 (8.9)               | 0 (0)    | 1       | 3 (7.1)                          | 1 (11.1) | 0.552        |
| Pulmonary crackles          | 7 (17.9)             | 16 (44.4) | <b>0.025</b> | 14 (31.1)             | 0 (0)    | 0.17    | 12 (28.6)                        | 2 (22.2) | 1            |
| Wheeze                      | 0 (0)                | 2 (5.6)   | 0.233        | 2 (4.3)               | 0 (0)    | 1       | 2 (4.8)                          | 0 (0)    | 1            |
| Flaring of ala nasi         | 5 (13.5)             | 6 (16.7)  | 0.961        | 7 (15.2)              | 1 (16.7) | 1       | 5 (11.9)                         | 3 (30)   | 0.171        |
| Lower chest indrawing       | 4 (10.8)             | 4 (11.8)  | 1            | 5 (11.1)              | 0 (0)    | 1       | 2 (4.8)                          | 3 (33.3) | <b>0.033</b> |
| Oxygen required for 48hours | 1 (9.1)              | 2 (12.5)  | 1            |                       |          |         | 2 (15.4)                         | 1 (14.3) | 1            |
| Severe pneumonia            | 38 (92.7)            | 39 (100)  | 0.241        | 47 (95.9)             | 5 (83.3) | 0.298   | 41 (93.2)                        | 11 (100) | 1            |
| Very severe pneumonia       | 4 (11.8)             | 4 (12.1)  | 1            | 5 (11.9)              | 0 (0)    | 1       | 2 (5)                            | 3 (37.5) | <b>0.027</b> |
