# Supplementary material for: Aetiological agents of pneumonia among HIV and non-HIV infected children in Ghana: A case-control study
Source: PubMed Central journal article supplement (PMC10959341; doi:10.1371/journal.pone.0299222), 2024-03-22
Supplement: pone.0299222.s004.pdf [file pone.0299222.s004.pdf]

**S3 Table. Clinical Presentation Associated with Microbial Detection in Non-HIV Patients**

| Clinical Presentation       | Viruses detected (%) |           |         | Bacteria detected (%) |          |         | Virus-Bacteria Co-infection (%) |           |         |
|-----------------------------|----------------------|-----------|---------|-----------------------|----------|---------|---------------------------------|-----------|---------|
|                             | Negative             | Positive  | P value | Negative              | Positive | P value | Negative                        | Positive  | P value |
| Total                       | 106                  | 125       |         | 68                    | 15       |         | 64                              | 19        |         |
| Shortness of breath         | 4 (12.5)             | 6 (13.6)  | 1       | 3 (13.6)              | 0 (0)    | 1       | 2 (10.5)                        | 1 (16.7)  | 1       |
| Poor feeding                | 32 (52.5)            | 30 (38)   | 0.124   | 23 (54.8)             | 6 (60)   | 1       | 21 (56.8)                       | 8 (53.3)  | 1       |
| Diarrhoea                   | 6 (10)               | 10 (13)   | 0.786   | 5 (12.2)              | 0 (0)    | 0.569   | 2 (5.4)                         | 3 (21.4)  | 0.12    |
| Vomiting                    | 22 (36.7)            | 23 (29.1) | 0.447   | 15 (35.7)             | 6 (60)   | 0.282   | 17 (44.7)                       | 4 (28.6)  | 0.462   |
| Rhinorrhoea                 | 30 (50)              | 34 (43.6) | 0.564   | 20 (47.6)             | 3 (30)   | 0.482   | 17 (45.9)                       | 6 (40)    | 0.934   |
| Fast breathing              | 37 (63.8)            | 49 (62)   | 0.974   | 26 (61.9)             | 4 (44.4) | 0.46    | 22 (59.5)                       | 8 (57.1)  | 1       |
| Chest recession             | 29 (49.2)            | 33 (42.3) | 0.533   | 14 (33.3)             | 5 (55.6) | 0.266   | 14 (37.8)                       | 5 (35.7)  | 1       |
| Lethargy                    | 15 (25)              | 13 (16.5) | 0.303   | 6 (14.3)              | 3 (30)   | 0.349   | 6 (15.8)                        | 3 (21.4)  | 0.688   |
| Pulmonary crackles          | 29 (48.3)            | 27 (33.8) | 0.117   | 13 (30.2)             | 5 (50)   | 0.279   | 13 (34.2)                       | 5 (33.3)  | 1       |
| Wheeze                      | 13 (21.7)            | 23 (29.1) | 0.425   | 11 (26.2)             | 2 (20)   | 1       | 9 (23.7)                        | 4 (28.6)  | 0.729   |
| Flaring of ala nasi         | 38 (64.4)            | 55 (68.8) | 0.722   | 24 (55.8)             | 7 (70)   | 0.494   | 20 (52.6)                       | 11 (73.3) | 0.285   |
| Lower chest indrawing       | 38 (64.4)            | 47 (59.5) | 0.682   | 21 (51.2)             | 7 (70)   | 0.48    | 19 (51.4)                       | 9 (64.3)  | 0.608   |
| Oxygen required for 48hours | 12 (22.2)            | 12 (16.4) | 0.553   | 8 (22.2)              | 3 (30)   | 0.682   | 8 (22.9)                        | 3 (27.3)  | 1       |
| Severe pneumonia            | 56 (91.8)            | 75 (94.9) | 0.503   | 38 (90.5)             | 10 (100) | 0.576   | 33 (89.2)                       | 15 (100)  | 0.311   |
| Very severe pneumonia       | 39 (69.6)            | 49 (71)   | 1       | 23 (63.9)             | 7 (70)   | 1       | 20 (60.6)                       | 10 (76.9) | 0.493   |
